# Supplementary material for: Ionic liquid-based uranium(vi) extraction with malonamide extractant: cation exchange vs. neutral extraction
Source: Royal Society of Chemistry journal article supplement (doi:10.1039/c6ra11345a), 2016-01-01
Supplement: c6ra11345a1.pdf [file c6ra11345a1.pdf]

## Supplementary information

Table S1: EXAFS fit results. N is the coordination number ( $\pm 20\%$ ), R is the interatomic distance ( $\pm 0.01 \text{ \AA}$ ),  $\sigma^2$  is the Debye-Waller factor ( $\pm 0.001 \text{ \AA}^2$ ),  $E_0$  is the shift in energy.  $R_{\text{factor}}$  indicates the goodness of the fit according to <sup>37</sup>.

\* Fixed parameter, # linked parameter

| Sample ID | paths                 | N     | R ( $\text{\AA}$ ) | $\sigma^2$ ( $\text{\AA}^2$ ) | $E_0$ (eV) | $R_{\text{factor}}$ |
|-----------|-----------------------|-------|--------------------|-------------------------------|------------|---------------------|
| Sample A  | Oax                   | 2*    | 1.78               | 0.002                         | 5.1        | 0.04                |
|           | O (DMDBMA)            | 5.8   | 2.38               | 0.007                         |            |                     |
|           | C                     | 4.8   | 3.42               | 0.006                         |            |                     |
|           | MS ax                 | 2#    | 3.56#              | 0.004*                        |            |                     |
|           | MS C-O-C              | 11.6# | 3.53#              | 0.008#                        |            |                     |
|           | MS O-C-O-C            | 5.8#  | 3.60#              | 0.008#                        |            |                     |
| S1_0_1    | Oax                   | 2*    | 1.77               | 0.002                         | 4.5        | 0.06                |
|           | O                     | 6.0   | 2.40               | 0.010                         |            |                     |
|           | C                     | 2.0   | 3.45               | 0.007                         |            |                     |
|           | MS ax                 | 2#    | 3.54#              | 0.004*                        |            |                     |
|           | MS C-O-C              | 4#    | 3.55#              | 0.008#                        |            |                     |
|           | MS O-C-O-C            | 2#    | 3.63#              | 0.008#                        |            |                     |
| S1_0_2    | Oax                   | 2*    | 1.77               | 0.002                         | 4.5        | 0.05                |
|           | O (DMDBMA)            | 5.7   | 2.38               | 0.008                         |            |                     |
|           | C                     | 4.0   | 3.43               | 0.005                         |            |                     |
|           | MS ax                 | 2#    | 3.55#              | 0.004#                        |            |                     |
|           | MS C-O-C              | 8#    | 3.53#              | 0.008#                        |            |                     |
|           | MS O-C-O-C            | 4#    | 3.61#              | 0.008#                        |            |                     |
| S1_0_3    | Oax                   | 2*    | 1.78               | 0.002                         | 4.5        | 0.05                |
|           | O (DMDBMA)            | 5.7   | 2.37               | 0.007                         |            |                     |
|           | C                     | 4.5   | 3.42               | 0.005                         |            |                     |
|           | MS ax                 | 2#    | 3.56#              | 0.004#                        |            |                     |
|           | MS C-O-C              | 9#    | 3.53#              | 0.008#                        |            |                     |
|           | MS O-C-O-C            | 4.5#  | 3.61#              | 0.008#                        |            |                     |
| S1_0_4    | Oax                   | 2*    | 1.77               | 0.002                         | 3.2        | 0.05                |
|           | O (DMDBMA)            | 5.7   | 2.37               | 0.007                         |            |                     |
|           | C                     | 5.8   | 3.42               | 0.006                         |            |                     |
|           | MS ax                 | 2#    | 3.56#              | 0.004#                        |            |                     |
|           | MS C-O-C              | 11.4# | 3.53#              | 0.008#                        |            |                     |
|           | MS O-C-O-C            | 5.7#  | 3.60#              | 0.008#                        |            |                     |
| Sample B  | Oax                   | 2*    | 1.77               | 0.002                         | 5.0        | 0.03                |
|           | O (DMDBMA)            | 2.2   | 2.37               | 0.005                         |            |                     |
|           | O ( $\text{NO}_3^-$ ) | 3.8   | 2.52               | 0.005                         |            |                     |
|           | C                     | 2.2#  | 3.47               | 0.004                         |            |                     |
|           | MS ax                 | 2#    | 3.55#              | 0.003#                        |            |                     |
|           | MS C-O-C              | 4.5#  | 3.55#              | 0.008#                        |            |                     |
|           | MS O-C-O-C            | 2.2#  | 3.62#              | 0.007#                        |            |                     |
|           | N                     | 1.9   | 2.95               | 0.003                         |            |                     |
|           | Od                    | 1.9#  | 4.21               | 0.005                         |            |                     |
|           | MS Od                 | 3.8#  | 4.21#              | 0.005#                        |            |                     |
|           | MS Od                 | 1.9#  | 4.21#              | 0.005#                        |            |                     |
| S1_1_2    | O                     | 2*    | 1.78               | 0.002                         | 5.2        | 0.03                |
|           | O (DMDBMA)            | 3.6   | 2.36               | 0.005                         |            |                     |
|           | O ( $\text{NO}_3^-$ ) | 2.4   | 2.51               | 0.005                         |            |                     |
|           | C                     | 3.6#  | 3.44               | 0.006                         |            |                     |
|           | MS ax                 | 2#    | 3.56#              | 0.003#                        |            |                     |
|           | MS C-O-C              | 7.3#  | 3.53#              | 0.008#                        |            |                     |
|           | MS O-C-O-C            | 3.6#  | 3.61#              | 0.007#                        |            |                     |
|           | N                     | 1.2#  | 2.93               | 0.004                         |            |                     |
|           | Od                    | 1.2#  | 4.21               | 0.006                         |            |                     |
|           | MS Od                 | 2.4#  | 4.21#              | 0.006#                        |            |                     |
|           | MS Od                 | 1.2#  | 4.21#              | 0.006#                        |            |                     |

|        |                                   |                   |                    |                    |     |      |
|--------|-----------------------------------|-------------------|--------------------|--------------------|-----|------|
| S1_2_2 | O                                 | 2*                | 1.78               | 0.002              | 5.3 | 0.05 |
|        | O(DMDBMA)                         | 3.0               | 2.36               | 0.006              |     |      |
|        | O (NO <sub>3</sub> <sup>-</sup> ) | 3.0               | 2.52               | 0.006              |     |      |
|        | C                                 | 3.0 <sup>#</sup>  | 3.45               | 0.005              |     |      |
|        | MS ax                             | 2 <sup>#</sup>    | 3.56 <sup>#</sup>  | 0.004 <sup>#</sup> |     |      |
|        | MS C-O-C                          | 6.0 <sup>#</sup>  | 3.54 <sup>#</sup>  | 0.008 <sup>#</sup> |     |      |
|        | MS O-C-O-C                        | 3.0 <sup>#</sup>  | 3.61 <sup>#</sup>  | 0.007 <sup>#</sup> |     |      |
|        | N                                 | 1.5 <sup>#</sup>  | 2.95               | 0.003              |     |      |
|        | Od                                | 1.5 <sup>#</sup>  | 4.21               | 0.005              |     |      |
|        | MS Od                             | 3.0 <sup>#</sup>  | 4.21 <sup>#</sup>  | 0.005 <sup>#</sup> |     |      |
| MS Od  | 1.5 <sup>#</sup>                  | 4.21 <sup>#</sup> | 0.005 <sup>#</sup> |                    |     |      |
| S1_3_2 | O                                 | 2*                | 1.78               | 0.002              | 4.5 | 0.04 |
|        | O(DMDBMA)                         | 2.6               | 2.37               | 0.006              |     |      |
|        | O (NO <sub>3</sub> <sup>-</sup> ) | 3.4               | 2.52               | 0.006              |     |      |
|        | C                                 | 2.6 <sup>#</sup>  | 3.45               | 0.006              |     |      |
|        | MS ax                             | 2 <sup>#</sup>    | 3.56 <sup>#</sup>  | 0.003 <sup>#</sup> |     |      |
|        | MS C-O-C                          | 5.1 <sup>#</sup>  | 3.54 <sup>#</sup>  | 0.008 <sup>#</sup> |     |      |
|        | MS O-C-O-C                        | 2.6 <sup>#</sup>  | 3.62 <sup>#</sup>  | 0.008 <sup>#</sup> |     |      |
|        | N                                 | 1.7 <sup>#</sup>  | 2.95               | 0.004              |     |      |
|        | Od                                | 1.7 <sup>#</sup>  | 4.21               | 0.005              |     |      |
|        | MS Od                             | 3.4 <sup>#</sup>  | 4.21 <sup>#</sup>  | 0.005 <sup>#</sup> |     |      |
| MS Od  | 1.7 <sup>#</sup>                  | 4.21 <sup>#</sup> | 0.005 <sup>#</sup> |                    |     |      |
| S1_2_1 | O                                 | 2*                | 1.78               | 0.002              | 5.5 | 0.05 |
|        | O(DMDBMA)                         | 2.0               | 2.36               | 0.006              |     |      |
|        | O (NO <sub>3</sub> <sup>-</sup> ) | 4.0               | 2.51               | 0.006              |     |      |
|        | C                                 | 2.0 <sup>#</sup>  | 3.46               | 0.005              |     |      |
|        | MS ax                             | 2 <sup>#</sup>    | 3.56 <sup>#</sup>  | 0.003 <sup>#</sup> |     |      |
|        | MS C-O-C                          | 4.0 <sup>#</sup>  | 3.54 <sup>#</sup>  | 0.008 <sup>#</sup> |     |      |
|        | MS O-C-O-C                        | 2.0 <sup>#</sup>  | 3.61 <sup>#</sup>  | 0.008 <sup>#</sup> |     |      |
|        | N                                 | 2.0 <sup>#</sup>  | 2.95               | 0.003              |     |      |
|        | Od                                | 2.0 <sup>#</sup>  | 4.21               | 0.005              |     |      |
|        | MS Od                             | 4.0 <sup>#</sup>  | 4.21 <sup>#</sup>  | 0.005 <sup>#</sup> |     |      |
| MS Od  | 2.0 <sup>#</sup>                  | 4.21 <sup>#</sup> | 0.005 <sup>#</sup> |                    |     |      |
| DCE    | O                                 | 2*                | 1.77               | 0.002              | 4.6 | 0.03 |
|        | O(DMDBMA)                         | 2.3               | 2.36               | 0.004              |     |      |
|        | O (NO <sub>3</sub> <sup>-</sup> ) | 3.7               | 2.51               | 0.004              |     |      |
|        | C                                 | 2.3 <sup>#</sup>  | 3.45               | 0.005              |     |      |
|        | MS ax                             | 2 <sup>#</sup>    | 3.56 <sup>#</sup>  | 0.003 <sup>#</sup> |     |      |
|        | MS C-O-C                          | 4.6 <sup>#</sup>  | 3.53 <sup>#</sup>  | 0.008 <sup>#</sup> |     |      |
|        | MS O-C-O-C                        | 2.3 <sup>#</sup>  | 3.61 <sup>#</sup>  | 0.011 <sup>#</sup> |     |      |
|        | N                                 | 1.8 <sup>#</sup>  | 2.94               | 0.002              |     |      |
|        | Od                                | 1.8 <sup>#</sup>  | 4.20               | 0.006              |     |      |
|        | MS Od                             | 3.7 <sup>#</sup>  | 4.20 <sup>#</sup>  | 0.006 <sup>#</sup> |     |      |
| MS Od  | 1.8 <sup>#</sup>                  | 4.20 <sup>#</sup> | 0.006 <sup>#</sup> |                    |     |      |

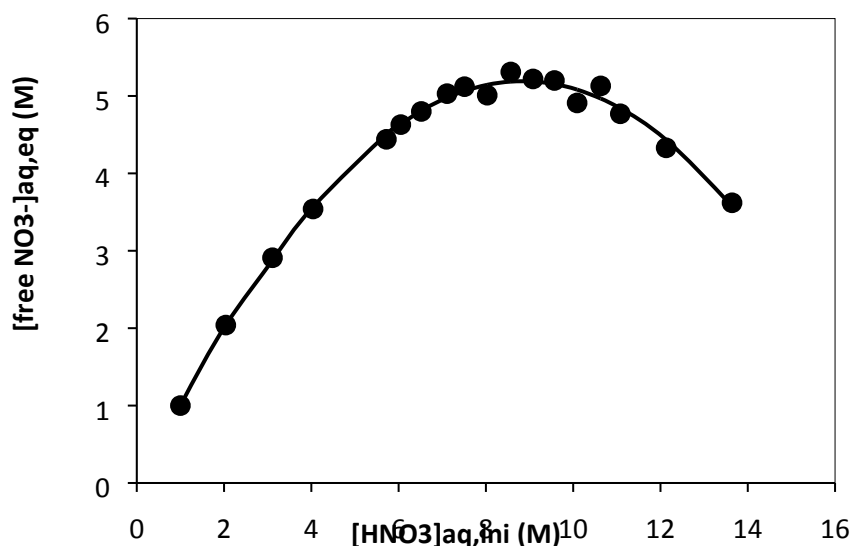

Figure S1: Free nitrate concentration in aqueous solution as a function of the initial nitric acid concentration, as given by <sup>44</sup> (dots). The solid line represents the data fit used in this study.

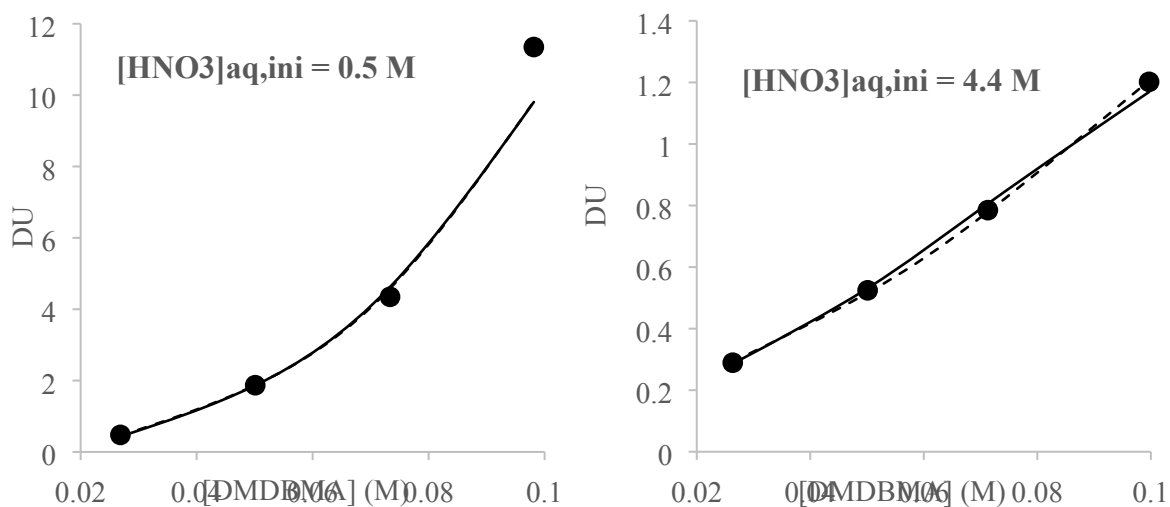

Figure S2: Evolution of the uranium distribution coefficient as a function of the DMBMA concentration in the IL phase, at two HNO<sub>3</sub> concentrations: 0.5 M (left) and 4.4 M (right). Lines represent data fits obtained by the model explained in part 4, taking into account the aqueous Tf<sub>2</sub>N<sup>-</sup> concentrations values: model from <sup>34</sup> (dotted lines) and new model developed in this paper (solid lines).
